# Supplementary material
Source: publisher site journal article supplement (https://www.spandidos-publications.com/4162/downloadSupplementary)
Supplement: Supplementary file 1 [file downloadSupplementary]

Data S1.

#### Fear of COVID-19 Scale

1. I am most afraid of Corona
2. It makes me uncomfortable to think about Corona
3. My hands become clammy when I think about Corona
4. I am afraid of losing my life because of Corona
5. When I watch news and stories about Corona on the social media, I become nervous or anxious.
6. I cannot sleep as I am worried about getting Corona.
7. My heart races or palpitates when I think about getting Corona.

#### Scoring

The participants indicate their level of agreement with the statements using a five-item Likert-type scale. Answers included 'strongly disagree', 'disagree', 'neutral', 'agree' and 'strongly agree'. The minimum score possible for each question is 1, and the maximum is 5. A total score could be calculated by adding up each item score (ranging from 7 to 35).

The 'Fear of COVID-19 Scale' was recently developed and validated in a Turkish population by Ahorsu *et al* (16).

Please respond to each item by ticking (✓) one of the five (5) responses that reflects how you feel, think or act toward COVID-19.

| Fear of COVID-19 items |                                                                                          | Strongly disagree | Disagree | Neutral | Agree | Strongly agree |
|------------------------|------------------------------------------------------------------------------------------|-------------------|----------|---------|-------|----------------|
| 1                      | I am most afraid of Corona                                                               |                   |          |         |       |                |
| 2                      | It makes me uncomfortable to think about Corona                                          |                   |          |         |       |                |
| 3                      | My hands become clammy when I think about Corona                                         |                   |          |         |       |                |
| 4                      | I am afraid of losing my life because of Corona                                          |                   |          |         |       |                |
| 5                      | When I watch news and stories about Corona on social media, I become nervous or anxious. |                   |          |         |       |                |
| 6                      | I cannot sleep because I'm worrying about getting Corona.                                |                   |          |         |       |                |
| 7                      | My heart races or palpitates when I think about getting Corona.                          |                   |          |         |       |                |
